# Supplementary material for: Impact of peatlands on carbon dioxide (CO 2 ) emissions from the Rajang River and Estuary, Malaysia
Source: Copernicus journal article supplement (doi:10.5194/bg-16-17-2019), 2019-01-08
Supplement: Supplementary file 1 [file bg-16-17-2019-supplement.zip]

Archive with 3 entries (3 files):
- supplement_revised.pdf
- SupplementaryTable.xlsx
- bg-16-17-2019-supplement-title-page.pdf
