# Supplementary material for: Impact of peatlands on carbon dioxide (CO 2 ) emissions from the Rajang River and Estuary, Malaysia
Source: Copernicus journal article supplement (doi:10.5194/bg-16-17-2019), 2019-01-08
Supplement: Supplementary file 1 [file bg-16-17-2019-supplement.zip › bg-16-17-2019-supplement-title-page.pdf]

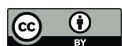

## *Supplement of*

# **Impact of peatlands on carbon dioxide (CO<sub>2</sub>) emissions from the Rajang River and Estuary, Malaysia**

**Denise Müller-Dum et al.**

*Correspondence to:* Denise Müller-Dum ([dmueller@iup.physik.uni-bremen.de](mailto:dmueller@iup.physik.uni-bremen.de))

- [bg-16-17-2019-supplement-title-page.pdf](#)
- [SupplementaryTable.xlsx](#)
- [supplement\\_revised.pdf](#)

The copyright of individual parts of the supplement might differ from the CC BY 4.0 License.
