# Supplementary material for: Impact of peatlands on carbon dioxide (CO 2 ) emissions from the Rajang River and Estuary, Malaysia
Source: Copernicus journal article supplement (doi:10.5194/bg-16-17-2019), 2019-01-08
Supplement: Supplementary file 1 [file bg-16-17-2019-supplement.zip › supplement_revised.pdf]

# 1 Pressure correction

## 1.1 Failure of the Internal Pressure Sensor

The Li-820 maintains a stable cell temperature and corrects the absorbance of CO<sub>2</sub> based on a measurement of the pressure in the cell. During the cruise in August 2016, a failure of the internal pressure sensor occurred on August 25, 2016 at 22:53 GMT. The failure was evident, because the cell pressure reading dropped from a relatively stable value of 102 kPa to 62.57 kPa within 10 seconds. Even when all tubes and pumps were removed and the Li-820 cell pressure was allowed to adjust to ambient pressure, the reading did not change. The internal pressure correction that the Li-820 performs was thus based on the false reading of a cell pressure of 62.57 kPa. The setup had not been changed, and the cell pressure before the failure had been at a stable level of approximately 102.2 kPa. Consequently, the pressure correction done by the Li-820 was reversed and performed again assuming an internal cell pressure of 102.2 kPa for the time after the failure of the pressure sensor.

## 1.2 Pressure Correction in the Li-820

The CO<sub>2</sub> mole fraction in the Li-820 is computed from a pressure-corrected measurement of absorbance. The pressure correction is performed by multiplication of the absorbance  $\alpha_c$  with an empirically determined correction function (Li-820 Manual, Eq. 4-4):

$$\alpha_{pc} = \alpha_c g_c(\alpha_c, P) \quad (1)$$

$$g_c(\alpha_c, P) = \begin{cases} X \text{ for } P < P_0 \\ 1 \text{ for } P = P_0 \\ \frac{1}{X} \text{ for } P > P_0 \end{cases} \quad (2)$$

with  $P_0 = 99 \text{ kPa}$  and  $X = \frac{1}{\frac{1}{b_1(p-1)} + \frac{1}{\frac{1}{b_2+b_3p} + b_4} - \frac{1}{b_5 - \alpha_c - \frac{1}{b_5}}}} + 1$  (Li-820 manual, Eq. 4-6). In

this equation,  $p = \frac{P_0}{P}$  or  $\frac{P}{P_0}$ , with  $p > 1$ .

So

$$\alpha_{pc} = \begin{cases} \alpha_c \cdot X \text{ for } P < P_0 \\ \frac{\alpha_c}{X} \text{ for } P > P_0 \\ \alpha_c \text{ for } P = P_0 \end{cases} \quad (3)$$

## 1.3 Correction for false cell pressure

In order to correct for the false cell pressure  $P_{meas}$ , the absorbance  $\alpha_c$  has to be computed. Then, the pressure-corrected absorbance  $\alpha_{pc}$  has to be calculated using the corrected pressure  $P_c$ .  $P_c$  was taken to be the average cell pressure during the measurements before the pressure sensor failed, which was 102.18

kPa. This value was considered a good approximation, as the cell pressure in the Li-820 was fairly stable during the time of measurements while the pressure sensor was still functioning.

The inverse function which allows calculation of the pressure-corrected absorbance from the mole fraction is given as

$$\alpha_{pc} = \frac{a_1 C}{a_2 + C} + \frac{a_3 C}{a_4 + C} \quad (4)$$

with  $a_1 = 0.3989974$ ,  $a_2 = 5897.2804$ ,  $a_3 = 0.097101982$ ,  $a_4 = 596.49981$  (Li-820 Manual, Eq. 4-7).

In order to calculate the absorbance  $\alpha_c$  from  $\alpha_{pc}$ , Equation 3 has to be rearranged and solved for  $\alpha_c$ . The solutions are:

$$\alpha_c = \begin{cases} -\frac{P_1}{2} - \sqrt{\left(\frac{P_1}{2}\right)^2 - Q_1} \text{ for } P < P_0 \\ -\frac{P_2}{2} - \sqrt{\left(\frac{P_2}{2}\right)^2 - Q_2} \text{ for } P > P_0 \\ \alpha_c \end{cases} \quad (5)$$

whereas

$$P_1 = \frac{\alpha_{pc} m b_5 (n+b_4) - \alpha_{pc} + b_5^2 (n+b_4)(m+1)}{-b_5 (n+b_4)(m+1) + 1}$$

$$Q_1 = -\frac{\alpha_{pc} m b_5^2 (n+b_4)}{-b_5 (n+b_4)(m+1) + 1}$$

$$P_2 = \frac{b_5^2 m (n+b_4) - \alpha_{pc} + \alpha_{pc} b_5 (1+m)(n+b_4)}{1 - b_5 m (n+b_4)}$$

$$Q_2 = -\frac{\alpha_{pc} b_5^2 (1+m)(n+b_4)}{1 - b_5 m (n+b_4)}$$

with  $m = \frac{1}{b_1(p-1)}$  and  $n = \frac{1}{b_2+b_3p}$ .

From  $\alpha_c$  and  $P_c$ , the corrected  $\alpha_{pc,c}$  is calculated according to Equation 1.  $C_c$  is calculated according to the manual:

$$C_c = \frac{D - (a_2 + a_4)\alpha_{pc,c} - \sqrt{A^2\alpha_{pc,c}^2 + B\alpha_{pc,c} + D^2}}{2(\alpha_{pc,c} - a_1 - a_3)} \quad (6)$$

whereas  $A = a_2 - a_4$ ,  $B = 2A(a_1 a_4 - a_2 a_3)$  and  $D = a_3 a_2 + a_1 a_4$  (Li-820 Manual, Eq. 4-10 and 4-11).

## 2 Salinity Interpolation

Salinity was only available at the stations (15 in the wet season, 34 in the dry season). However, in order to be able to interpret  $O_2$  and  $CO_2$  data, it is useful to know their distribution along a salinity gradient. Therefore, salinity in the estuary was spatially interpolated. Since the saltwater intrusion limit was presumably different between wet and dry season, interpolation was performed for the entire area under tidal influence (downstream of Kanowit). Beyond that point, salinity was measured to be zero.

Since some points for which interpolation was desired lay outside the area covered by our measurements, we added three reference points to better constrain the grid to be interpolated. The coordinates of these points were:

$$(2.0, 2.5, 3.5), (111.0, 111.0, 111.8) \quad (7)$$

These reference points all lie within the South China Sea off the coast of Sarawak. The salinity value ascribed to them was 33 according to our own measurements and those of Wang et al. (2014) for the Southern South China Sea. Interpolation was achieved with the Scipy Interpolation package for Python (`scipy.interpolate.griddata`) using linear interpolation. Figure 1a shows the points used for interpolation, Figures 1b and c show the results for the wet and dry season, respectively.

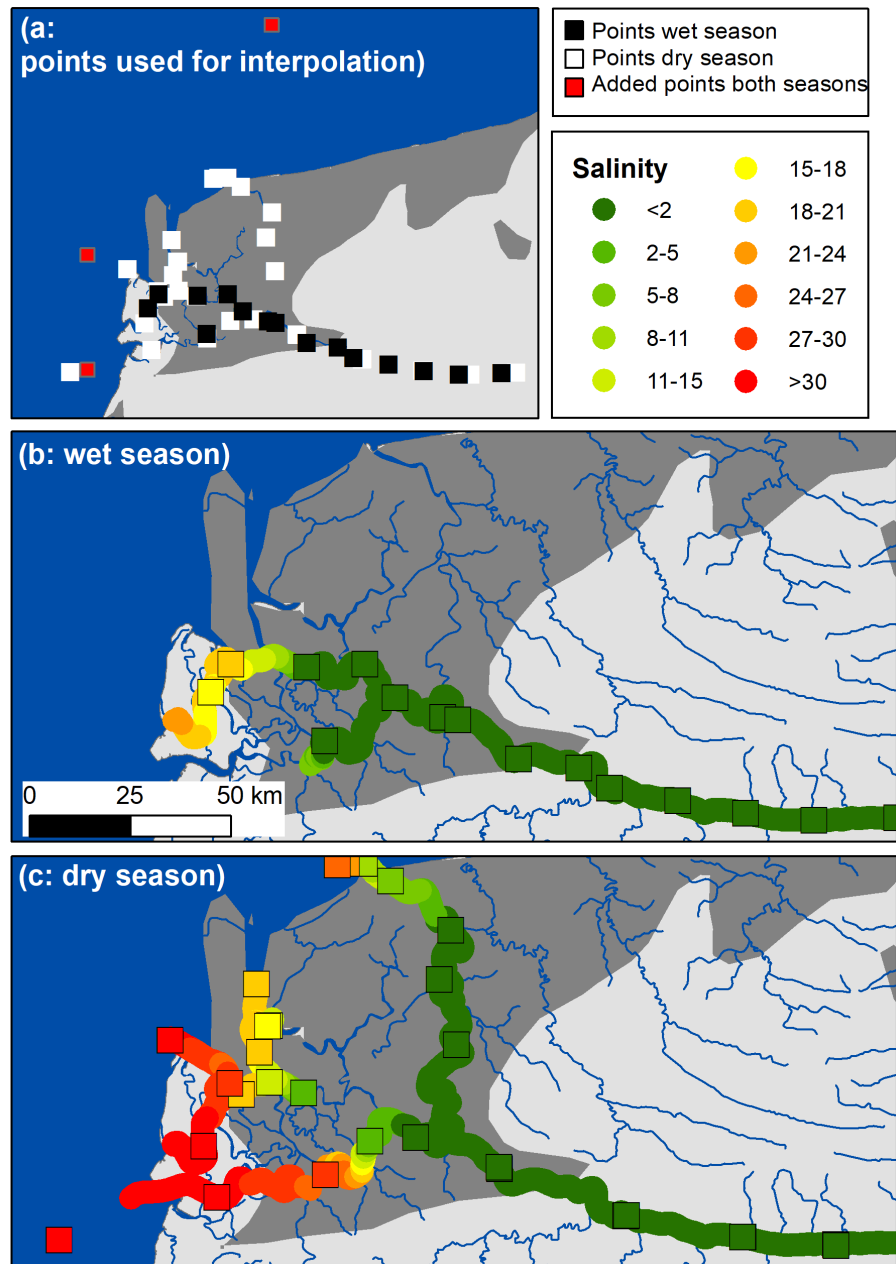

Figure 1: Data points used for interpolation (a), results for the wet (b) and dry (c) season. Interpolated salinity is shown in graduated colors, actual measurements are shown as squares.

### 3 Water surface area in the delta

We used stream widths for the Rajang River from the GRWL (Global River Widths from Landsat) Database (Allen and Pavelsky, 2018). The length of the river segments was determined using ArcMap 10.5 and multiplied by the mean river width. Missing parts were manually delineated using a georeferenced Landsat satellite image (Fig. 2, source of the Landsat image: <https://landsat.visibleearth.nasa.gov/view.php?id=91787> (last access: Oct 9th, 2018)). The total water surface area in the Rajang catchment was calculated at 755 km<sup>2</sup> or 1.5% of the catchment area.

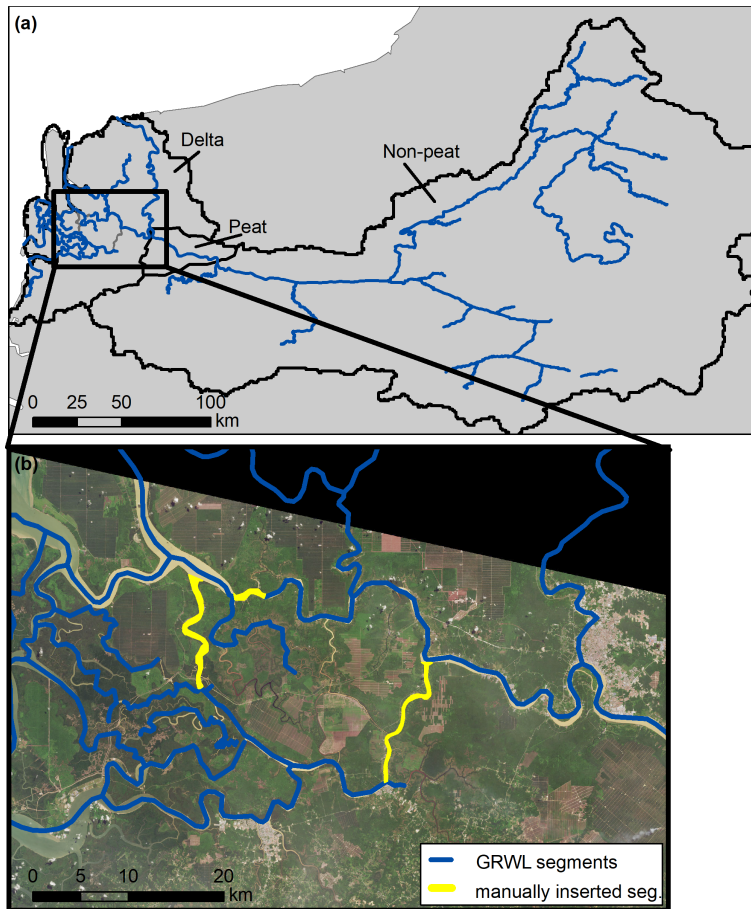

Figure 2: River segments used to determine the water surface area of the Rajang River. The close-up shows manually delineated segments in the delta using a georeferenced satellite image.

## 4 Tides

Tidal variability was only observed at the river mouth. The Figure shows water level from close-by stations and the measured  $\text{pCO}_2$ . The rectangle marks the only stationary measurement, which was performed in Sarikei overnight and covers one tidal cycle. For all other data, spatial and temporal variations are overlapping, because the ship was moving. Tidal variability in  $\text{pCO}_2$  cannot be observed at all upstream of Sibü or in the Igan distributary. In the Paloh and Rajang distributary, variability in  $\text{pCO}_2$  is high, but this is partly attributed to mixing with sea water.

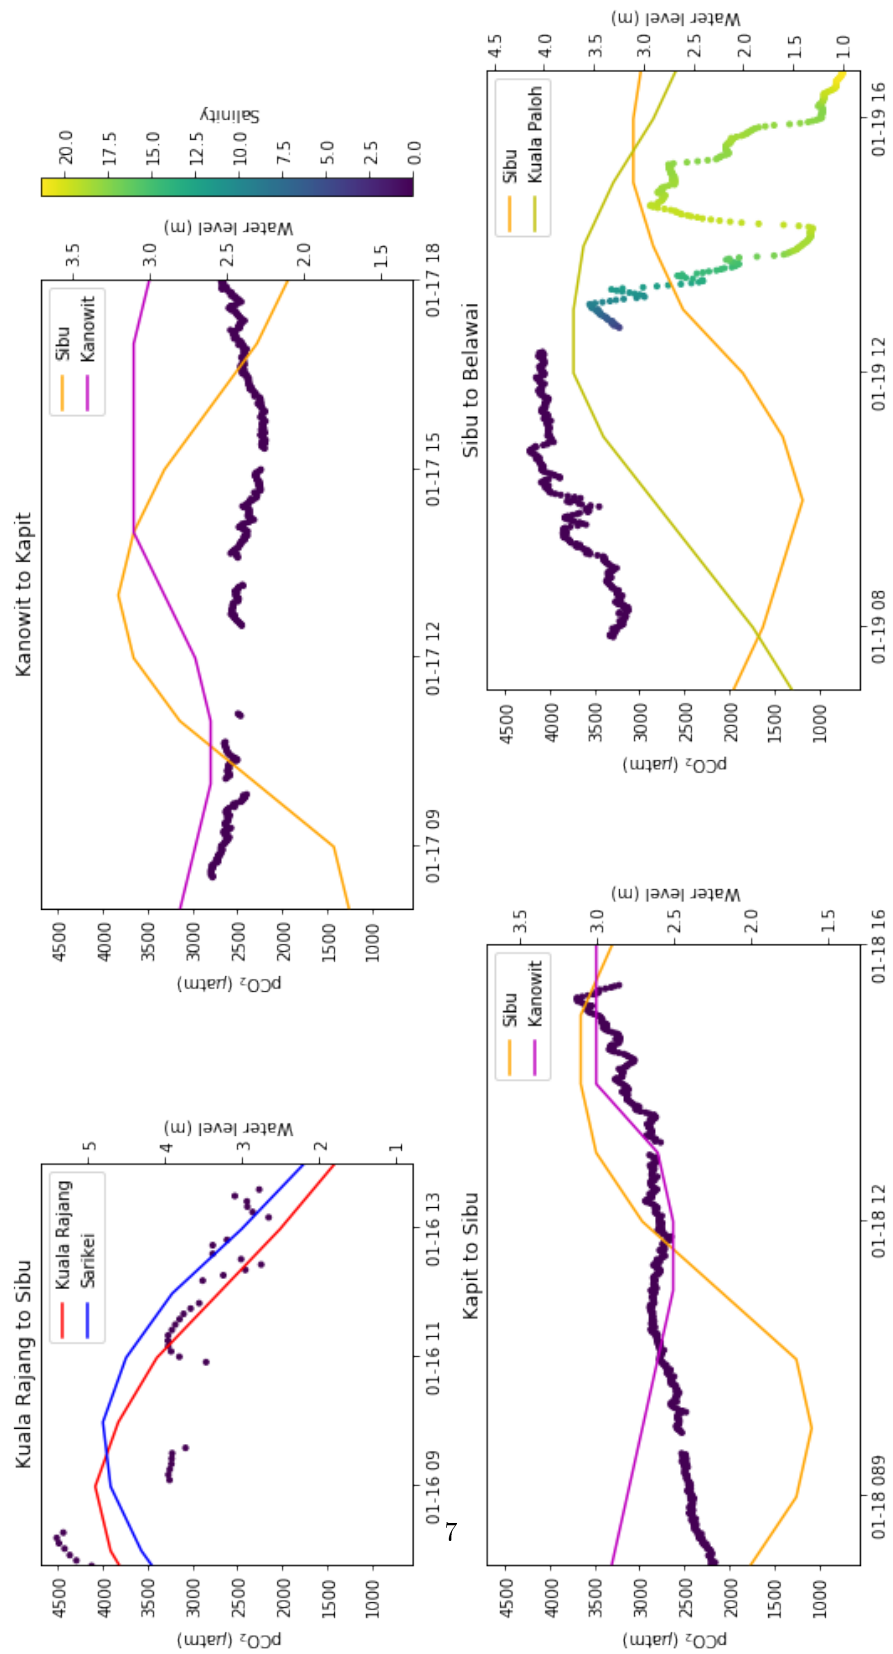

Figure 3: Measured pCO<sub>2</sub> in January 2016 and water level in different river reaches.

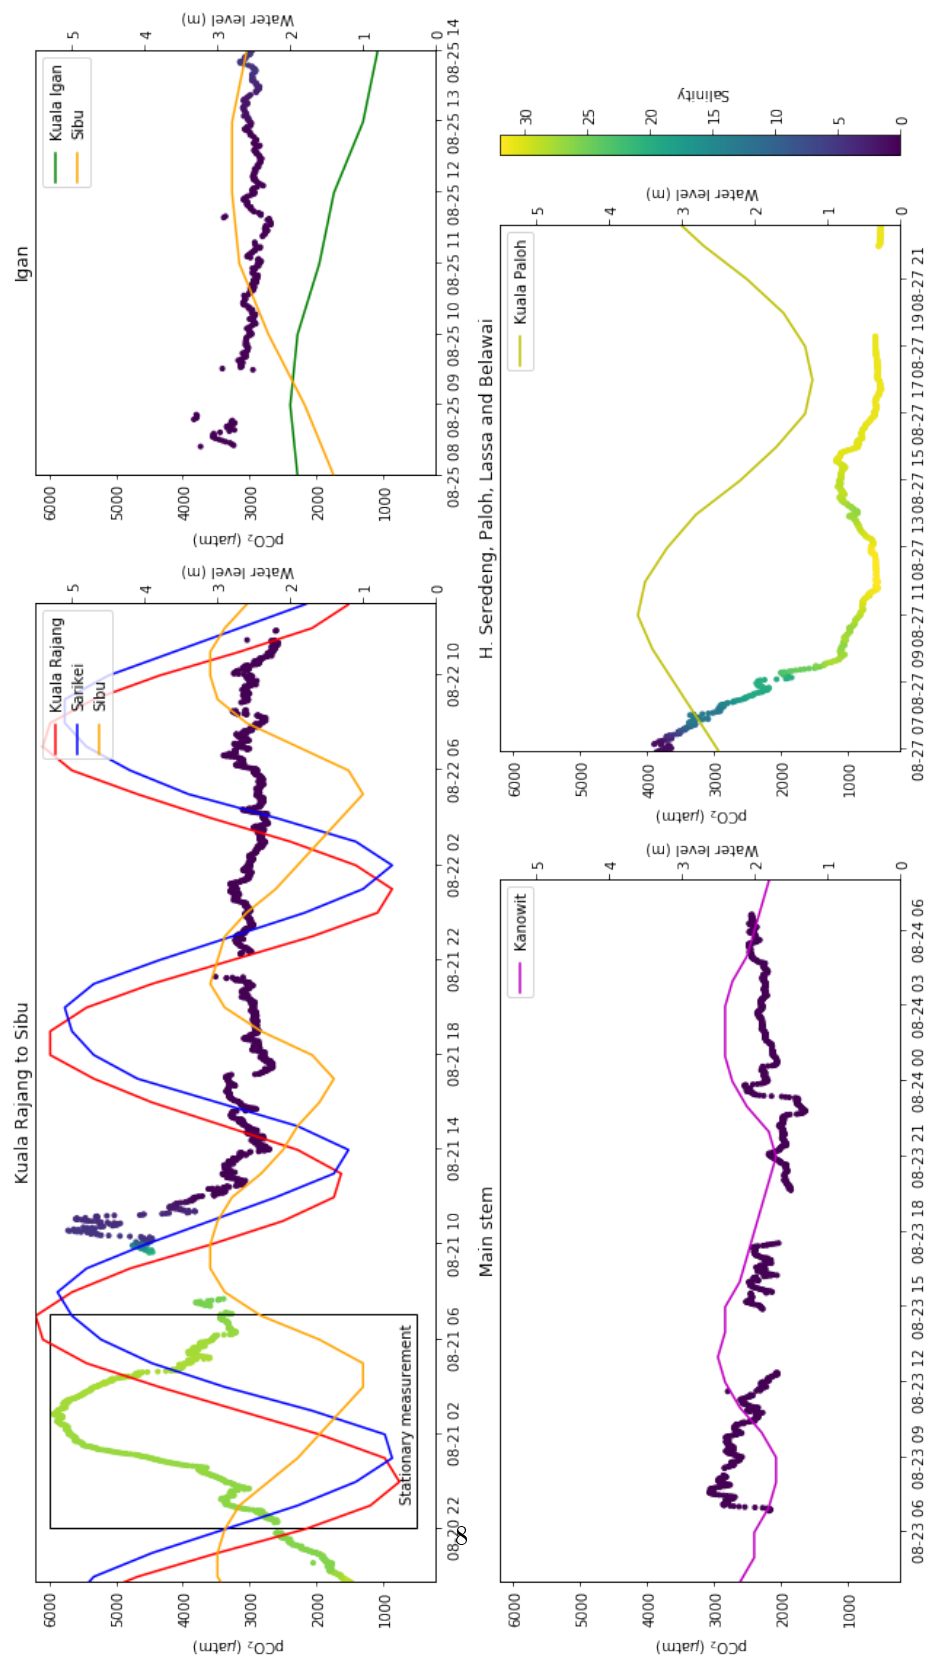

Figure 4: Measured  $p\text{CO}_2$  in August 2016 and water level in different river reaches.

## 5 Gas transfer velocity considerations

The choice of a  $k$ -model has a big impact on the calculated  $\text{CO}_2$  fluxes. Therefore, three different models are compared (Table 1). Additional uncertainty arises from the input data. Those models depend on wind speed and water flow velocity. In the absence of in-situ wind speed data, we had to use the NOAA NCEP Reanalysis product; however, wind speed on-site might differ from these values, which would impact our results for  $k$ . Secondly, we used two literature values for the Rajang River’s water flow velocity  $w$ , that is, one fixed value for both seasons. According to Raymond et al. (2012),  $w$  scales with discharge  $Q^{0.29 \pm 0.01}$ . During the peak of the monsoon season in January,  $Q$  is approximately 50 % higher than average discharge, which would mean that  $w$  would be enhanced by 12 %. If we consider this the variability in  $w$  ( $w = 0.9 \pm 0.1 \text{ m s}^{-1}$ ), it would add an uncertainty of 4 % to  $k_{600, B04}$ . However, the deviation among the different  $k$ -models is much larger than that (Table 1), so the biggest source of uncertainty isn’t the input data, but the choice of a  $k$ -model. Table 1 presents a comparison of three different  $k$ -parameterizations.

|          |     | $k_{600}$ |       |      | $\text{FCO}_2$ |               |               |
|----------|-----|-----------|-------|------|----------------|---------------|---------------|
|          |     | B04       | A11   | R01  | B04            | A11           | R01           |
| non-peat | wet | 8.23      | 8.51  | 2.32 | $1.9 \pm 0.2$  | $2.0 \pm 0.2$ | $0.5 \pm 0.0$ |
|          | dry | 9.57      | 12.19 | 2.79 | $2.0 \pm 0.3$  | $2.6 \pm 0.4$ | $0.6 \pm 0.1$ |
| peat     | wet | 8.23      | 8.51  | 2.32 | $2.3 \pm 0.2$  | $2.4 \pm 0.2$ | $0.7 \pm 0.1$ |
|          | dry | 9.57      | 12.19 | 2.79 | $2.7 \pm 0.1$  | $3.5 \pm 0.2$ | $0.8 \pm 0.0$ |
| delta    | wet | 8.23      | 8.51  | 2.32 | $2.3 \pm 1.0$  | $2.4 \pm 1.0$ | $0.7 \pm 0.3$ |
|          | dry | 9.57      | 12.19 | 2.79 | $2.3 \pm 1.4$  | $3.0 \pm 1.7$ | $0.7 \pm 0.4$ |

Table 1: Comparison of the results for different  $k$ -parameterizations. B04: Borges et al. (2004), A11: Alin et al. (2011), R01: Raymond & Cole (2001).  $\pm$  represents the spread of the data (derived from the spread of the  $\text{pCO}_2$ ). In the main manuscript, the average of the three values is used, minimum and maximum are reported alongside.

## 6 Mixing model

We used a simple mixing model to estimate the theoretically possible contribution of the peatlands to river  $\text{pCO}_2$ . The model consists of two subsequent steps. First, the mixing of two water bodies was simulated, one with a  $\text{pCO}_2$  of 2434  $\mu\text{atm}$  and a pH of 6.8 (Rajang River), and the other with a  $\text{pCO}_2$  of 8100  $\mu\text{atm}$  and a pH of 3.8 (representing peat-draining rivers according to Müller et al., 2015). The DIC and TA of these water bodies were calculated using  $\text{CO}_2\text{Sys}$ . DIC and TA of the mixture were calculated as

$$\text{DIC}_{S=0} = (1 - pc) \cdot \text{DIC}_1 + pc \cdot \text{DIC}_2 \quad (8)$$

and

$$TA_{S=0} = (1 - pc) \cdot TA_1 + pc \cdot TA_2, \quad (9)$$

whereas  $pc$  is the peat coverage in the basin as the river flows downstream and passes through more and more peat areas ( $pc=0...0.11$ ). As a next step, for  $pc > 0.03$ , mixing with saltwater was taken into account. It was assumed that  $pc=0.03$  corresponds to  $S=0$  and that  $pc=0.11$  corresponds to  $S=32$  and within this range, salinity increased linearly with increasing peat coverage. This is obviously a simplification, but since the model has only illustrative purposes, it seemed sufficient. DIC and TA were then calculated with a normal end-member mixing model:

$$DIC = \frac{DIC_{S=32} - DIC_{S=0}}{32} \cdot S + DIC_{S=0} \quad (10)$$

and

$$TA = \frac{TA_{S=32} - TA_{S=0}}{32} \cdot S + TA_{S=0}, \quad (11)$$

whereas  $TA_{S=32} = 2324 \mu mol L^{-1}$  and  $DIC_{S=32} = 2347 \mu mol L^{-1}$  according to our measurements.  $pCO_2$  was calculated from TA and DIC using CO<sub>2</sub> Sys. The mixing model and the results are shown in Figure 4.

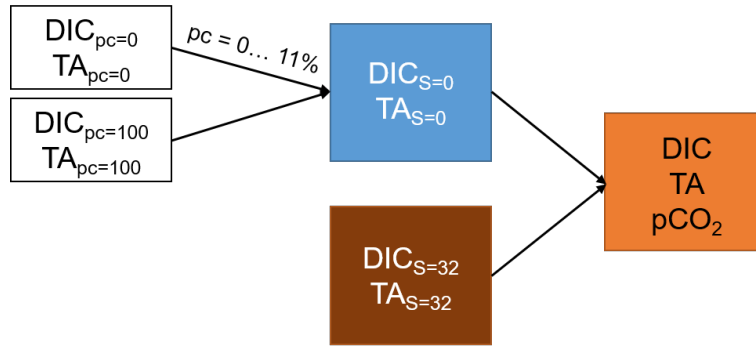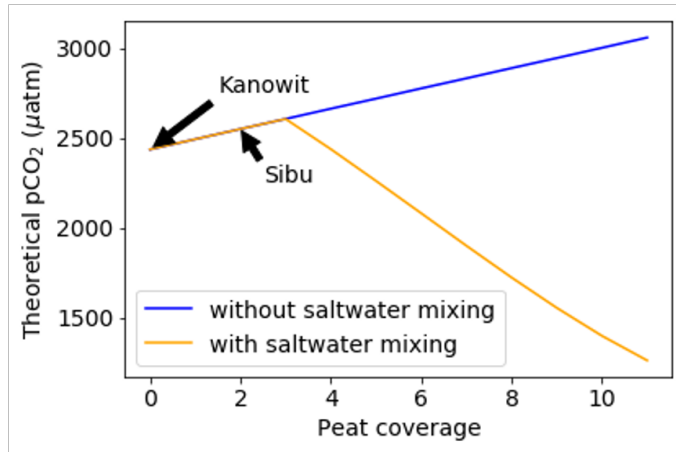

Figure 5: Mixing model flow chart and plot of the results for theoretically possible  $\text{pCO}_2$  if peat is the only source of  $\text{CO}_2$  in the delta.

## 7 Supplementary Data

The data used in this manuscript are available as a separate excel workbook.

## 8 References

- Alin, S. R., de Fatima F. L. Rasera, M., Salimon, C., I., Richey, J. E., Holtgrieve, G. W., Krusche A. V., and Snidvongs, A. Physical controls on carbon dioxide transfer velocity and flux in low-gradient river systems and implications for regional carbon budgets. *Journal of Geophysical Research* 116, G01009, doi: 10.1029/2010JG001398, 2011.
- Allen, G. H. and Pavelsky, T. M. Global extent of rivers and streams. *Science* 361, 585-588, doi: 10.1126/science.aat0636, 2018.

Borges, A. V., Vanderborght, J.-P., Schiettecatte, L.-S., Gazeau, F., Ferron-Smith, S., Delille, B., and Frankignoulle, M. Variability of the Gas Transfer Velocity of CO<sub>2</sub> in a Macrotidal Estuary (the Scheldt). *Estuaries* 27(4): 593-603, 2004.

LI-COR, Inc. Li-820 Instruction Manual, Lincoln, Nebraska, USA, 2002.

Müller, D., Warneke, T., Rixen, T., Müller, M., Jamahiri, S., Denis, N., Mujahid, A., and Notholt, J. Lateral carbon fluxes and CO<sub>2</sub> outgassing from a tropical peat-draining river. *Biogeosciences* 12: 5967-5979. doi: 10.5194/bg-12-5967-2015, 2015.

Müller, D., Warneke, T., Rixen, T., Müller, M., Mujahid, A., Bange, H. W., and Notholt, J. Fate of terrestrial organic carbon and associated CO<sub>2</sub> and CO emissions from two Southeast Asian estuaries. *Biogeosciences* 13: 691-705. doi: 10.5194/bg-13-691-2016, 2016.

Raymond, P. A., and Cole, J. J. Gas exchange in rivers and estuaries: Choosing a gas transfer velocity. *Estuaries* 24 (2): 312-317, 2001.

Wang, Y., Jiang, H., Zhang, X., and Jin, J. Spatial and temporal distribution of sea surface salinity in coastal waters of China based on Aquarius. *IOP Conference Series: Earth and Environmental Science* 17: 012116, 2014.
